# Supplementary material for: Wearable and Washable MnO2−Zn Battery Packaged by Vacuum Sealing
Source: MDPI journal article supplement (doi:10.3390/nano13020265), 2023-01-07
Supplement: s1 [file s1]

Supplementary Information

# Wearable and Washable MnO<sub>2</sub>–Zn Battery Packaged by Vacuum Sealing

Jun Ho Noh <sup>1,2,†</sup>, Myoungun Oh <sup>1,†</sup>, Sunjin Kang <sup>1</sup>, Hyeong Seok Lee <sup>1</sup>, Yeong Jun Hong <sup>1</sup>, Chaeyeon Park <sup>1</sup>, Raeyun Lee <sup>1</sup> and Changsoon Choi <sup>1,3,\*</sup>

<sup>1</sup> Department of Energy and Materials Engineering, Dongguk University, 30 Pildong-ro, 1-gil, Jung-gu, Seoul 04620, Republic of Korea

<sup>2</sup> Department of Advanced Battery Convergence Engineering, Dongguk University, 30 Pildong-ro, 1-gil, Jung-gu, Seoul 04620, Republic of Korea

<sup>3</sup> Research Center, Sillo Incorporation, 30 Pildong-ro, 1-gil, Jung-gu, Seoul 04620, Republic of Korea

\* Correspondence: cschoi84@dongguk.edu

† These authors contributed equally to this work.

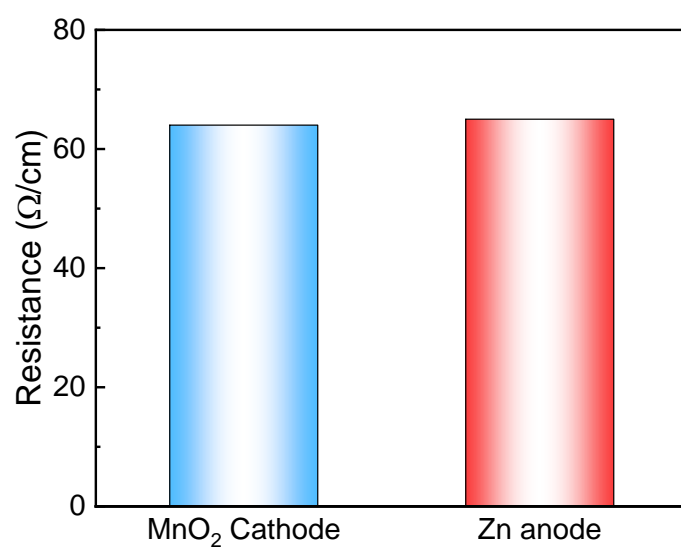

**Figure S1.** Electrical resistances of the MnO<sub>2</sub> yarn cathode and Zn yarn anode.

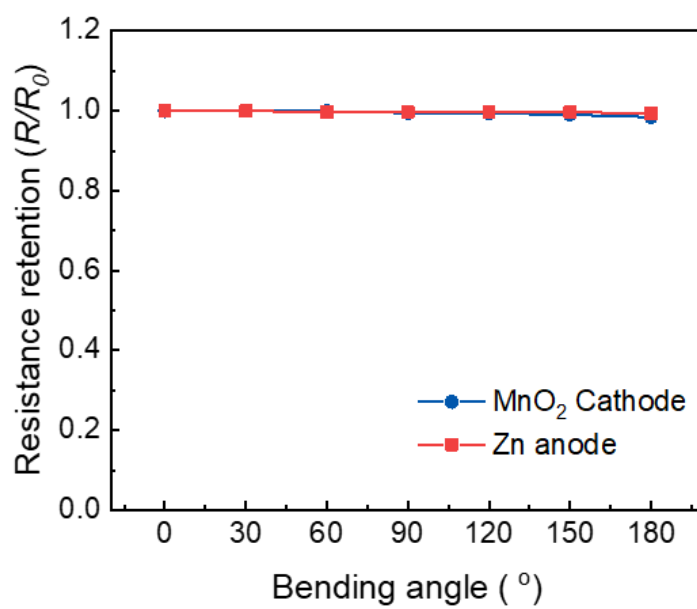

**Figure S2.** Resistance retention ratios ( $R/R_0$ ) of the MnO<sub>2</sub> yarn cathode and Zn yarn anode under various bending angles from 0° to 180°.

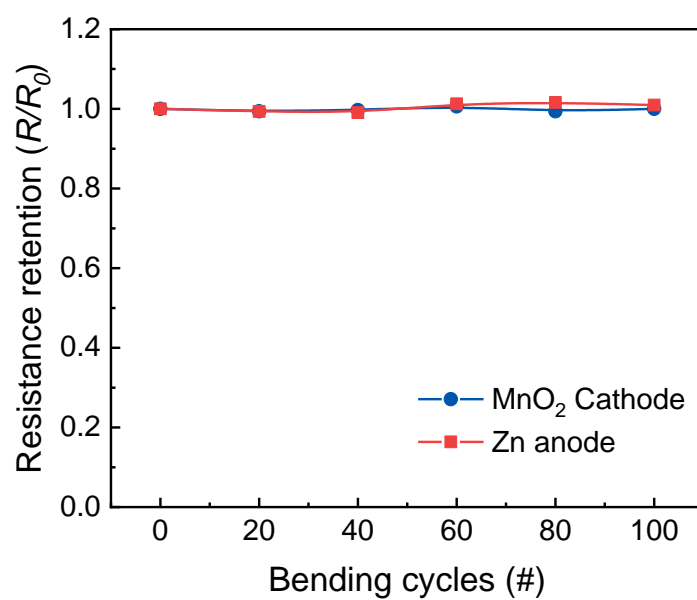

**Figure S3.** Resistance retention ratios ( $R/R_0$ ) of the MnO<sub>2</sub> yarn cathode and Zn yarn anode after 100 cycles with a bending angle of 180°.

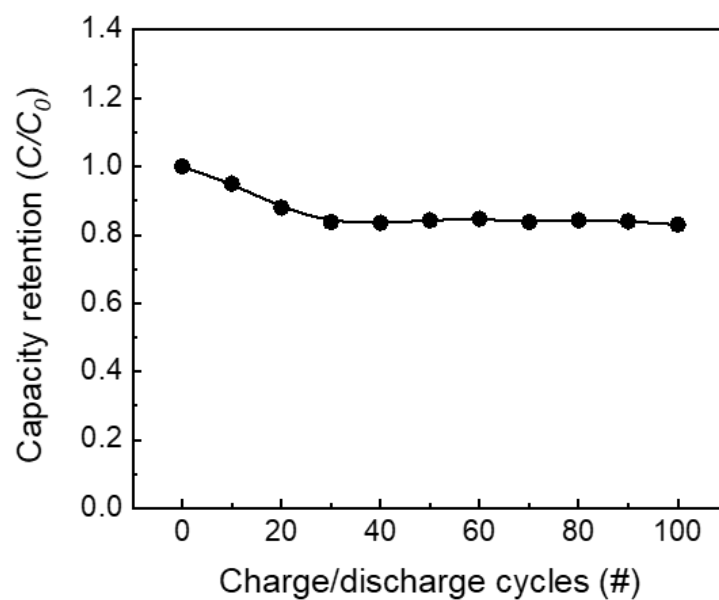

**Figure S4.** Capacity retention ratios ( $C/C_0$ ) of the  $\text{MnO}_2\text{-Zn}$  textile battery during 100 charge/discharge cycles.
